# Supplementary material for: AML1-ETO-Related Fusion Circular RNAs Contribute to the Proliferation of Leukemia Cells
Source: MDPI journal article supplement (doi:10.3390/ijms24010071), 2022-12-21
Supplement: s1 [file s1]

## Supplemental Methods

### Construction of F-CircAE2

Based on the sequence of AML1 and ETO (<https://www.ncbi.nlm.nih.gov/pubmed>), the Alu elements were found on the website <http://www.repeatmasker.org>. AluSx3 and AluJb were chosen as the complementary repetitive intronic sequences.

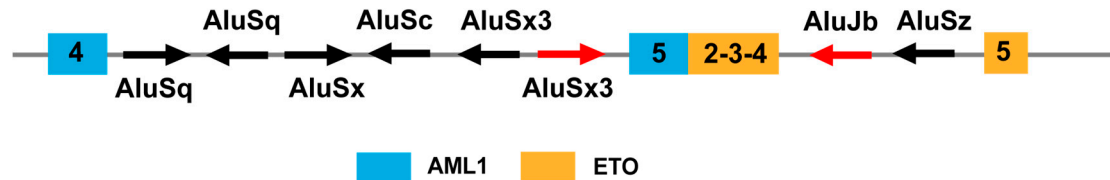

NEBuilder assembly tool (<http://nebuilder.neb.com>) provided the primer sequences, annealing temperatures, and the sequence of assembled vector.

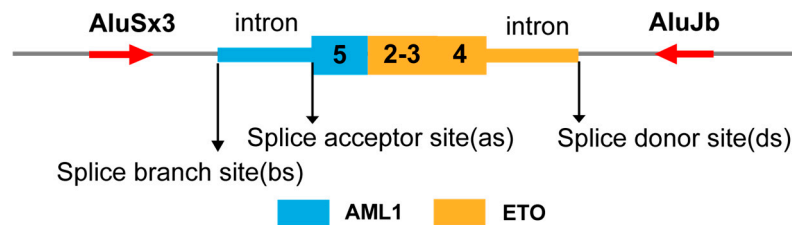

#### Vector Digestion

Vector backbone opened with XbaI

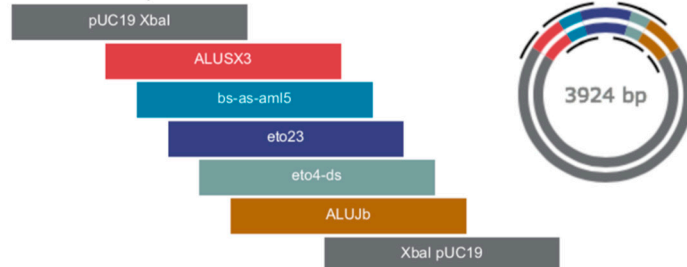

#### Required Primers <sup>2</sup>

| Overlaps   | Oligo (Uppercase = gene-specific primer)            | Anneals    | F/R | 3' Tm  | 3' Ta * | 6-Frame              |
|------------|-----------------------------------------------------|------------|-----|--------|---------|----------------------|
| pUC19      | gctcggtaccgccgggacccctTTGGGAGGCCAAGGTGGG            | ALUSX3     | Fwd | 63.6°C | 53.7°C  | <a href="#">view</a> |
| bs-as-aml5 | atatctgttgTTTTTTTTTTTTTTTTTTTTTTTGAGATGGAGCTTGCACTG | ALUSX3     | Rev | 58.7°C | 53.7°C  | <a href="#">view</a> |
| ALUSX3     | aaaaaaaaaaCAACAGATATGTTTCAGGCCACC                   | bs-as-aml5 | Fwd | 58.1°C | 53.1°C  | <a href="#">view</a> |
| eto23      | tcagtacgatTTCGAGGTCTCTCGGGGCC                       | bs-as-aml5 | Rev | 63.0°C | 53.1°C  | <a href="#">view</a> |
| bs-as-aml5 | gaacctcgaaATCGTACTGAGAAGCACTCC                      | eto23      | Fwd | 55.9°C | 50.9°C  | <a href="#">view</a> |
| eto4-ds    | aagtggagttCACTAGTCCCAGAACGAGG                       | eto23      | Rev | 56.9°C | 50.9°C  | <a href="#">view</a> |
| eto23      | gggactagtGAACCTCACTTTGACAATTGAAGAATTTC              | eto4-ds    | Fwd | 55.5°C | 50.5°C  | <a href="#">view</a> |
| ALUJb      | gaaaaagaaTGACCTAGCAACAATATGGTTTAAATACTTTAC          | eto4-ds    | Rev | 56.4°C | 50.5°C  | <a href="#">view</a> |
| eto4-ds    | tgctaggtcaTTCTTTCTTTCTTTCTTTTTTTTTTTTTTTTTTGAACAAAG | ALUJb      | Fwd | 55.5°C | 50.5°C  | <a href="#">view</a> |
| pUC19      | tgcattgcctgcaggctgactAACACTTCAGGAGTCAAGG            | ALUJb      | Rev | 56.5°C | 50.5°C  | <a href="#">view</a> |

### Plasmid constructs

### ***F-CircAE retroviral expression vector***

Gibson Assembly Cloning Kit (New England Biosciences, USA) was used to clone the expression vector of F-CircAE [20]. The intronic and exonic sequences were obtained from genomic DNA and cDNA, respectively, then synthesized and inserted into the pUC19 vector. Supplemental Methods showed a schematic representation of fragment arrangement, vector digestion, and overlapping primers. Then the insertion of assembled DNA fragment was ligated into a retroviral vector MSCV-MCS-IRES-BFP. The empty vector was used as a control.

### ***The F-CircAE-Mut retroviral expression vector***

The F-CircAE2-Mut linear transcript was constructed by mutating the splicing donor site of F-CircAE2 from G to C, as shown in Figure 2A, through overlap PCR, using the assembled DNA fragment as a template. Overlapping primers are shown in Table S2. Then the F-CircAE2-Mut fragment was ligated into a retroviral vector MSCV-MCS-IRES-BFP mentioned above.

### ***Establishment of stable cell lines***

The short hairpin double-stranded oligo (Table S3) targeting the back-splice junction of the F-CircAE was inserted into the pLKO.1-puro or pLKO.1-GFP lentiviral vector. The successfully constructed vectors were verified by restriction digestion and sequencing. The scramble was used as a control (Table S3). Kasumi-1 cells and BMMNCs from AML1-ETO positive patients were infected with lentivirus carrying pLKO.1-puro or pLKO.1-GFP lentiviral plasmid. Stable gene silencing is selected using the puromycin selectable marker or fluorescent cell sorting.

### ***Retrovirus and lentivirus generation and infection***

Retrovirus and lentivirus generation and infection were described before [54].

### ***Colony Formation Assay of c-Kit<sup>+</sup> HSPCs.***

Six-week-old female C57BL/6 mice were obtained from the Institute of Laboratory Animal Sciences (CAMS & PUMC, China). According to the manufacturer's instructions, the c-Kit<sup>+</sup> hematopoietic stem and progenitor cells (HSPCs) from murine bone marrow were purified with anti-c-Kit microbeads (Miltenyi Biotec, USA). The isolated c-Kit<sup>+</sup> cells were pre-stimulated with murine IL-3, IL-6, and SCF, followed by infection of retroviral supernatant (MSCV-MCS-IRES-BFP). Then the BFP<sup>+</sup> cells were sorted by flow cytometry, and  $1 \times 10^3$  cells per well were plated into a 48-well plate triplicate in MethoCult M3434 methylcellulose. After a week, colonies (> 40 cells) were counted.

### ***Western blot analysis***

Total cellular lysates were obtained with RIPA lysis buffer containing PMSF (Roche, Switzerland) and protease inhibitor cocktail (Roche, Switzerland). The protein samples were run on a 10% SDS-PAGE gel and transferred to a polyvinylidene difluoride membrane. Then the membranes were incubated with cell cycle associated antibodies against CDK2, CyclinE, p27, p21(Cell Signaling Technology, USA) and glycolysis-associated antibodies (Glycolysis Antibody Sampler Kit #8337, Glycolysis II Antibody Sampler Kit #12866, Cell Signaling Technology, USA). Anti- $\beta$ -actin (Sigma-Aldrich, USA) was used as a loading control. The immunoreactive proteins were visualized using the SuperSignal chemiluminescent detection system (Pierce, USA).
