# Supplementary material for: AML1-ETO-Related Fusion Circular RNAs Contribute to the Proliferation of Leukemia Cells
Source: MDPI journal article supplement (doi:10.3390/ijms24010071), 2022-12-21
Supplement: s1 [file s1]

**Figure S1**

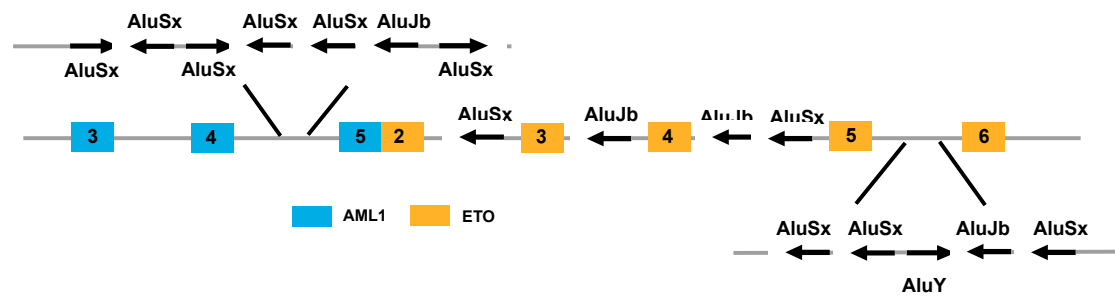

**Figure S1** Alu repeats that existed in the intron sequence near the *AML1-ETO* breakpoint were recognized by RepeatMasker (<http://www.repeatmasker.org>).

**Figure S2**

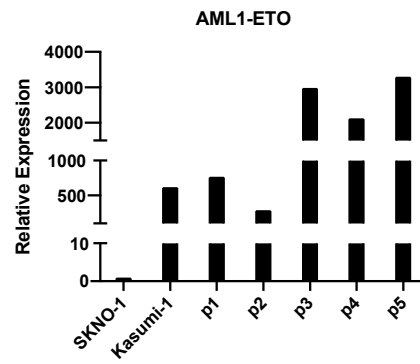

**Figure S2** RT-PCR analysis of AML1-ETO expression in Kasumi-1, SKNO-1, and BMMNCs of AML patients.

**Figure S3**

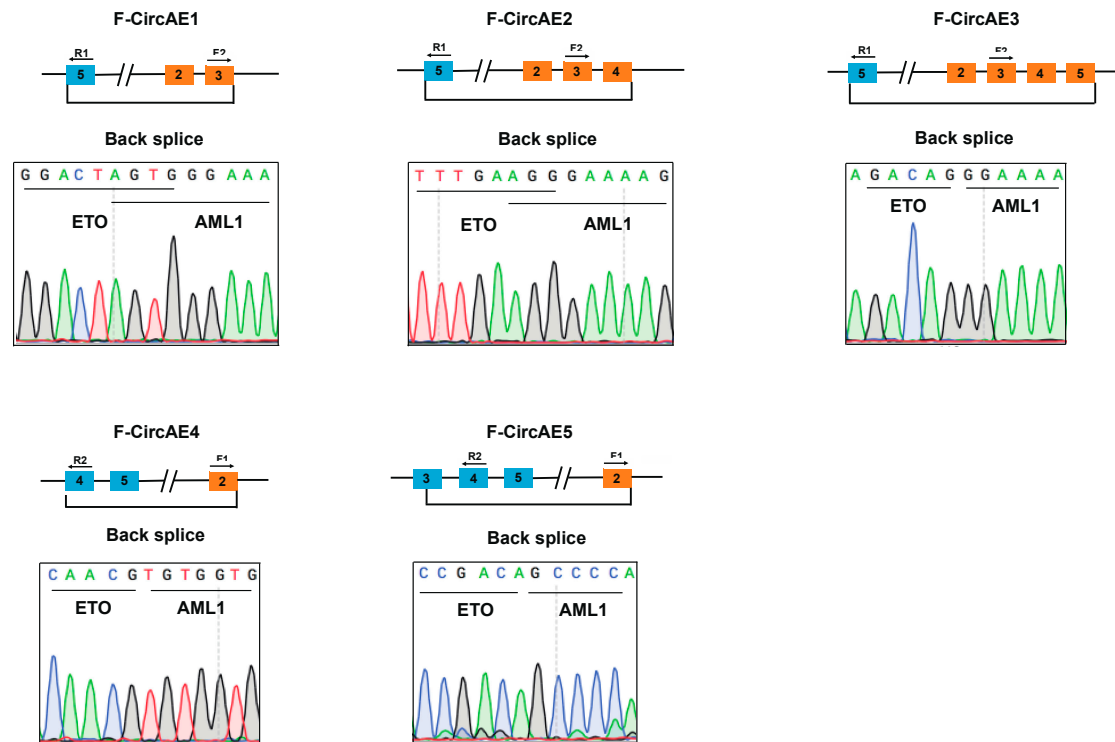

**Figure S3** The composition and head-to-tail splicing sites of F-CircAEs were represented. The sequences of F-CircAE2 and F-CircAE3 have been submitted to the GenBank database (MG551955, MG551956).

**Figure S4**

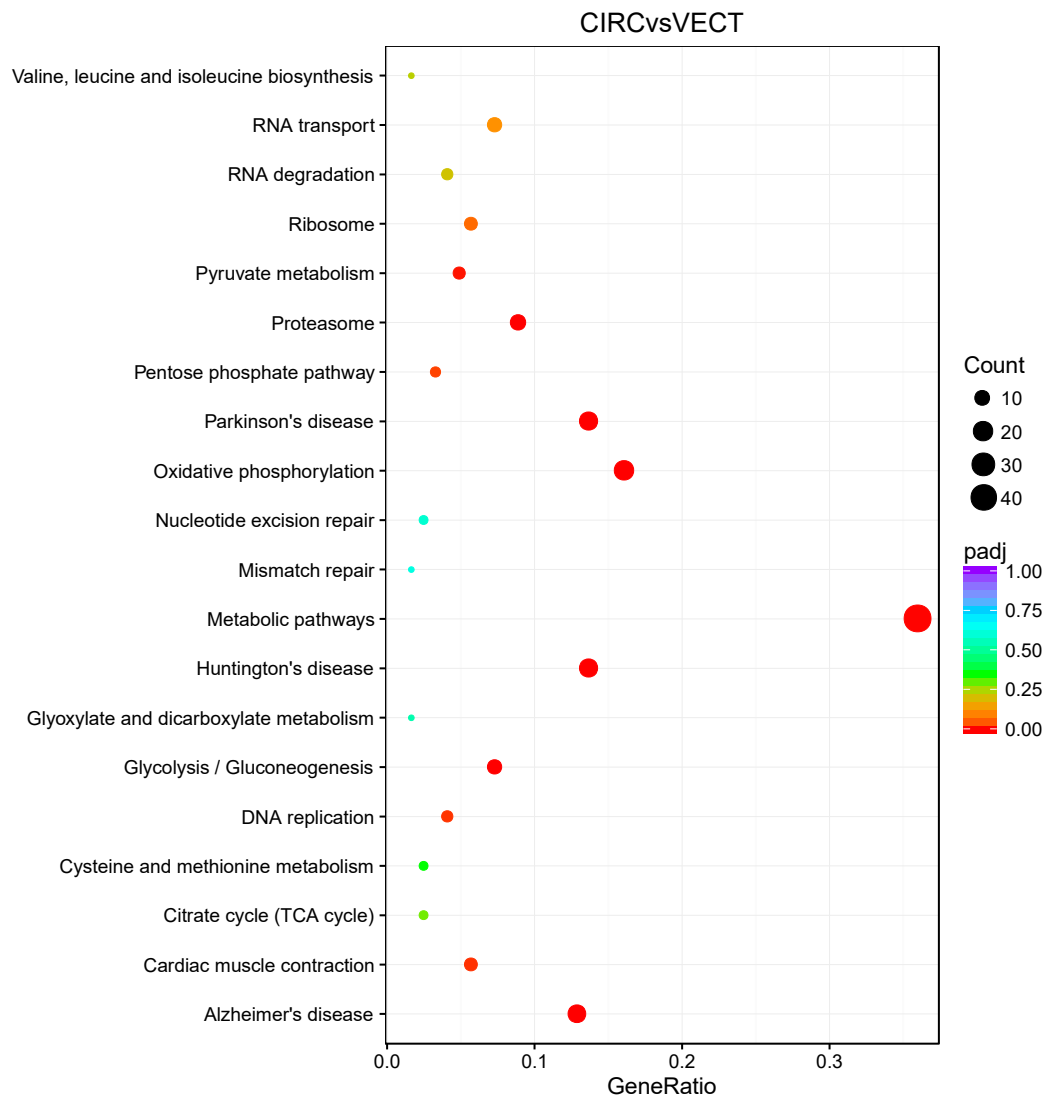

**Figure S4** KEGG analysis was performed on the up-regulated DEGs between the F-CircAE2 and the VECT groups in NIH3T3 Cells. The vertical axis represents the top 20 enriched pathways according to the gene counts. The different colors represent the  $-\log_{10}$  of adjusted  $p$  values. The horizontal axis represents the Gene ratio.

**Figure S5**

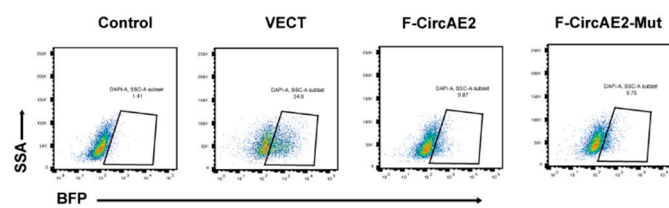

**Figure S5** The BFP<sup>+</sup> HSPCs were sorted through flow cytometry.

**Figure S6**

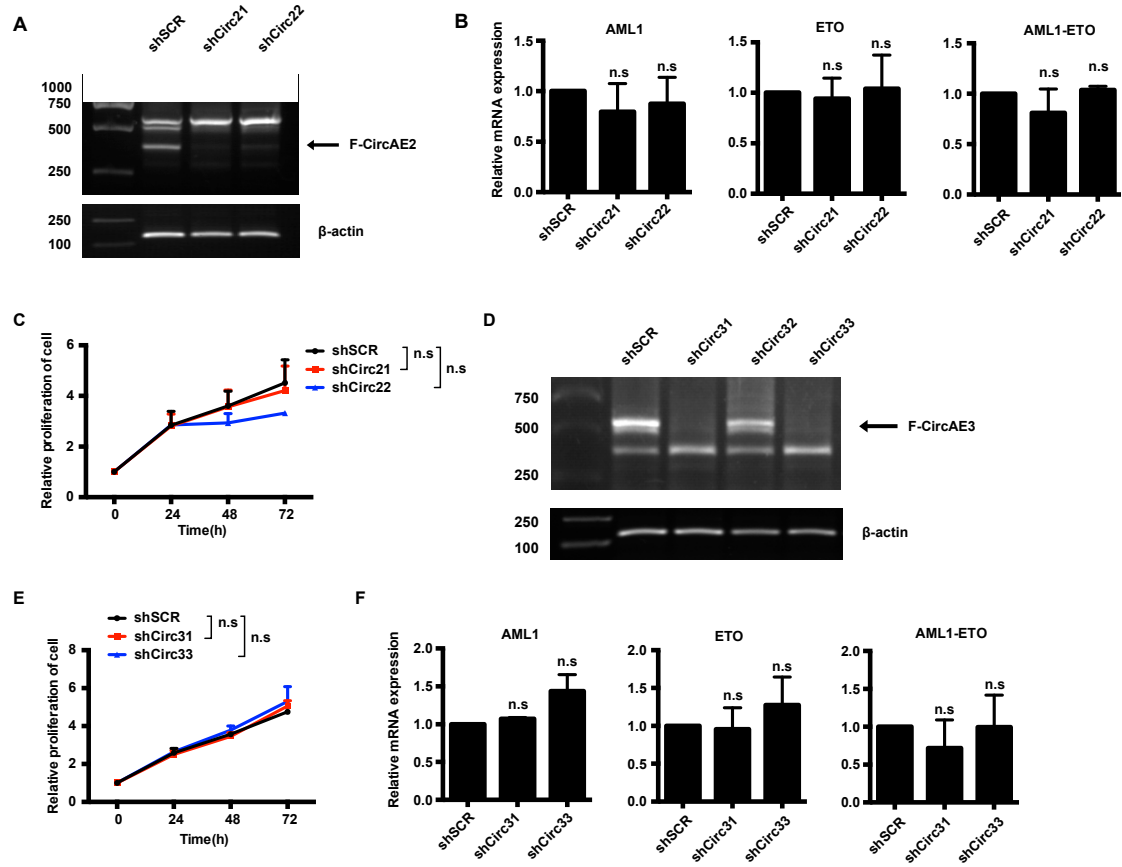

**Figure S6**

- (A) shCirc21 and shCirc22 targeting the back-splice junction of F-CircAE2 efficiently knocked down the expression of F-CircAE2,  $\beta$ -actin was used as control.
- (B) RT-PCR analysis of linear transcripts of *AML1*, *ETO*, and *AML1-ETO* using specific primers after F-CircAE2 knockdown.
- (C) The proliferation of F-CircAE2 knockdown Kasumi-1 cells showed no significant difference compared with the scramble group.
- (D) shCirc31, shCirc32, and shCirc33 were specific for F-CircAE3 knockdown. The knockdown efficiency was measured by PCR using out-facing primers, while  $\beta$ -actin was used as control.
- (E) F-CircAE3 knockdown did not affect Kasumi-1 cells proliferation.

**(F)** RT-PCR analysis of linear transcripts of AML1, ETO, and AML1-ETO using specific primers.

**Figure S7**

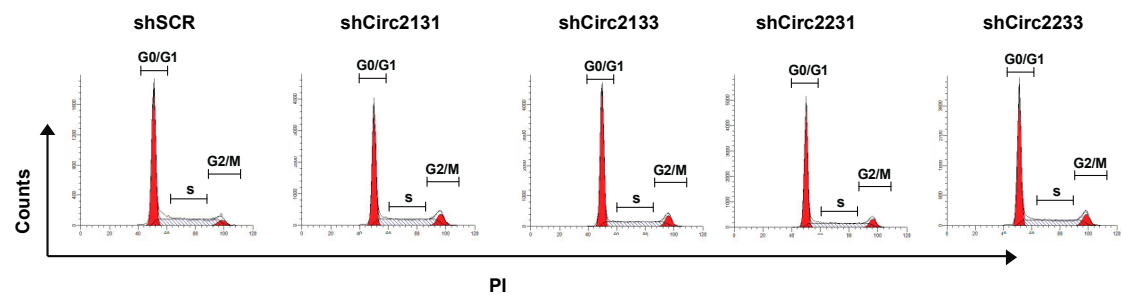

***Figure S7*** Cell cycle distribution was analyzed by flow cytometry using PI staining.



***Figure S8***

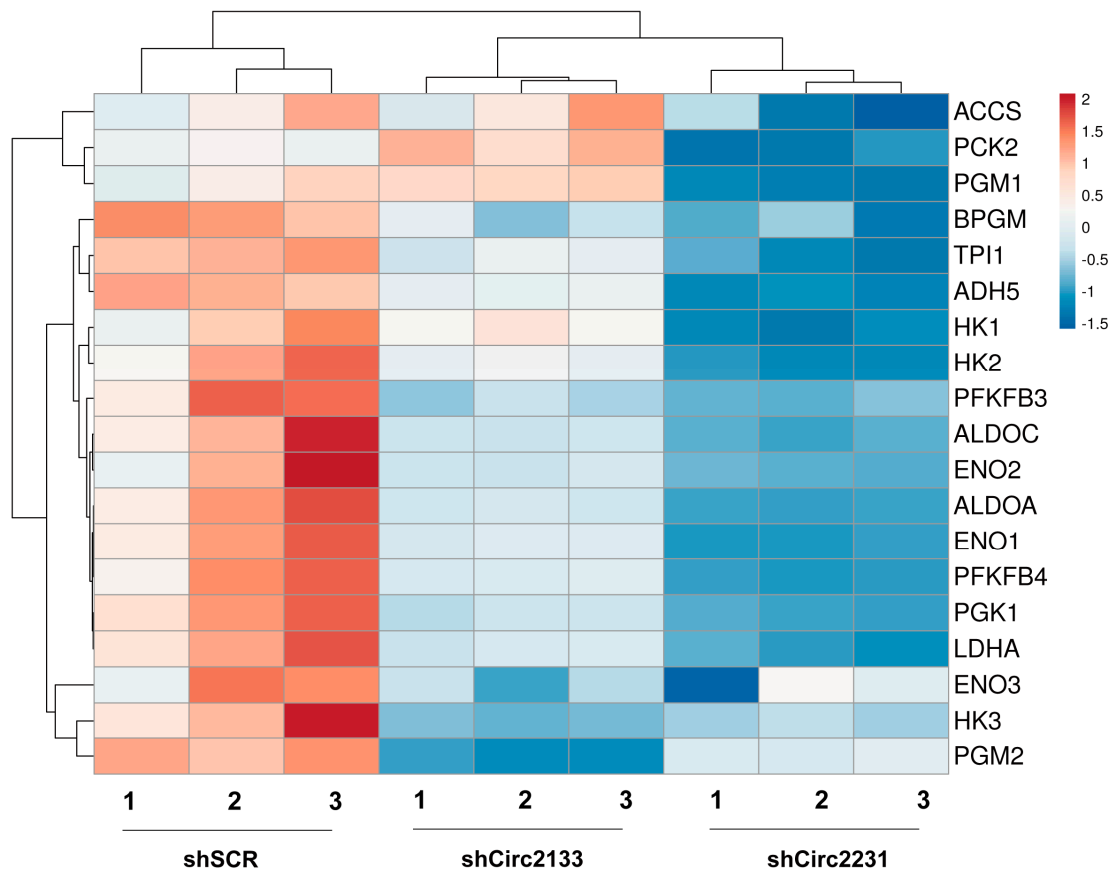

***Figure S8*** The heatmap of differentially expressed genes in the glycolysis pathway upon F-CircAEs knockdown in Kasumi-1 cells as identified by RNA-seq experiments. Heatmaps were generated using ClustVis (<https://biit.cs.ut.ee/clustvis/>). The different colors represent the row centered fold change values (blue = lower, white = intermediate, red = higher).
