# Supplementary material for: AML1-ETO-Related Fusion Circular RNAs Contribute to the Proliferation of Leukemia Cells
Source: MDPI journal article supplement (doi:10.3390/ijms24010071), 2022-12-21
Supplement: s1 [file s1]

## Supplemental Tables

**Table S1.** Divergent primers sequences for the identification of AML1-ETO-related fusion circular RNAs. Forward primers are located at exon 2 (F1) and exon 3 (F2) of *ETO*, while reverse primers are located at exon 4 (R2) and exon 5 (R1) of *AML1*.

|                            |                            |
|----------------------------|----------------------------|
| Forward 1 (F1, ETO exon2)  | 5'-CCTGTGGATGTGAAGACGCA-3' |
| Forward 2 (F2, ETO exon3)  | 5'-TCCTACAGCCTTGAATGGCG-3' |
| Reverse 1 (R1, AML1 exon5) | 5'-CTGTGGTAGGTGGCGACTTG-3' |
| Reverse 2 (R2, AML1 exon4) | 5'-ACAGTGACCAGAGTGCCATC-3' |

Primer and probe sequences for F-CircAE copy number detection. The F-CircAE2-F-pro, R1 primer set was used to identify F-CircAE2; and F-CircAE3-F-pro, R1 primer set was used to identify F-CircAE3.

|                 |                                              |
|-----------------|----------------------------------------------|
| F-CircAE2 Probe | 5'-FAM-TCCCATTTTTGAAGGGAAAAGCTTCACTCT-MGB-3' |
| F-CircAE3 Probe | 5'-FAM-ACTCCAGACAGGGAAAAGCTTCAC-MGB-3'       |
| F-CircAE2-F-pro | 5'-ACTGCAAGAAGCTACTAACTTC-3'                 |
| F-CircAE3-F-pro | 5'-GCTGCTTCTCGATGTGAACG-3'                   |
| R1              | 5'-CTGTGGTAGGTGGCGACTTG-3'                   |

**Table S2.** Primer sequences for overlap PCR. The F-CircAE2-Mut linear transcript was constructed by mutating the splicing donor site of F-CircAE2 from G to C, as shown in Figure 2A, through overlap PCR (as shown below), using the assembled DNA fragment as a template. Overlapping primers are shown in Table S2. The red uppercase letters show the mutation bases.

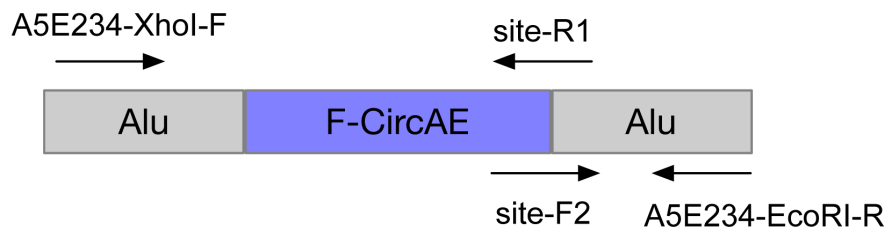

|             |                                   |
|-------------|-----------------------------------|
| AE2-XhoI-F  | 5'-CCTGTGGATGTGAAGACGCA-3'        |
| site-R1     | 5'- GAACTGTGCAATAGCTTCAAAAAT -3'  |
| site-F2     | 5'- CCCATTTTTTGAAGCTATTGCACAG -3' |
| AE2-EcoRI-R | 5'-ACAGTGACCAGAGTGCCATC-3'        |

**Table S3.** shRNA sequences targeting back-splice junction of F-CircAEs. shCirc21 and shCirc22 specifically target the F-CircAE2. shCirc31, shCirc32, and shCirc33 target the back-splice junction of F-CircAE3.

|          |           |                       |
|----------|-----------|-----------------------|
| shCirc21 | sense     | TTTGAAGGGAAAAGCTTCACT |
|          | antisense | AGTGAAGCTTTTCCCTTCAAA |
| shCirc22 | sense     | TGAAGGGAAAAGCTTCACTCT |
|          | antisense | AGAGTGAAGCTTTTCCCTTCA |

|          |           |                       |
|----------|-----------|-----------------------|
| shCirc31 | sense     | AAGCTTTTCCCTGTCTGGAGT |
|          | antisense | ACTCCAGACAGGGAAAAGCTT |
| shCirc32 | sense     | GCTTTTCCCTGTCTGGAGTTC |
|          | antisense | GAACTCCAGACAGGGAAAAGC |
| shCirc33 | sense     | TGAAGCTTTTCCCTGTCTGGA |
|          | antisense | TCCAGACAGGGAAAAGCTTCA |

|       |       |                       |
|-------|-------|-----------------------|
| shSCR | sense | CCTAAGGTTAAGTCGCCCTCG |
|-------|-------|-----------------------|

|  |           |                       |
|--|-----------|-----------------------|
|  | antisense | CGAGGGCGACTTAACCTTAGG |
|--|-----------|-----------------------|

**Table S4.** DNA oligo probe sequence targeting the back-splice site of F-CircAE2. The sequence of the control probe is the antisense sequence.

|                   |                                                  |
|-------------------|--------------------------------------------------|
| against F-CircAE2 | 5'-biotin-aaaCAGAGTGAAGCTTTTCCCTTCAAAAATGGGAT-3' |
| antisense probe   | 5'-biotin-aaaATCCCATTTTTGAAGGGAAAAGCTTCACTCTG-3' |

**Table S5.** Primers used for RT-PCR analysis of glycolysis-related mRNA levels in Kasumi-1 cells.

|          |                         |
|----------|-------------------------|
| ALDOA F  | ATGCCCTACCAATATCCAGCA   |
| ALDOA R  | GCTCCCAGTGGACTCATCTG    |
| ALDOB F  | GGCAGTTCCGAGAAATCCTCT   |
| ALDOB R  | CTCCTTGGTCTAACTTGATTCCC |
| ALDOC F  | ATGCCTCACTCGTACCCAG     |
| ALDOC R  | TTCCACCCCAATTTGGCTCA    |
| PFKFB3 F | ATTGCGGTTTTTCGATGCCAC   |
| PFKFB3 R | GCCACAACGTAGGGTCGT      |
| PFKFB4 F | TCCCCACGGGAATTGACAC     |
| PFKFB4 R | GGGCACACCAATCCAGTTCA    |
| ENO1 F   | AAAGCTGGTGCCGTTGAGAA    |
| ENO1 R   | GGTTGTGGTAAACCTCTGCTC   |
| ENO2 F   | AGCCTCTACGGGCATCTATGA   |
| ENO2 R   | TTCTCAGTCCCATCCAACCTCC  |
| ENO3 F   | GGCTGGTTACCCAGACAAGG    |
| ENO3 R   | TCGTACTTCCCATTGCGATAGAA |
| PGK1 F   | TGGACGTAAAGGGAAGCGG     |
| PGK1 R   | GCTCATAAGGACTACCGACTTGG |
| PGM1 F   | CCAAACCGACTGAAGATCCGT   |
| PGM1 R   | CATGTTTCGATCCCCATCTCC   |

|         |                         |
|---------|-------------------------|
| PGM2 F  | GAGGCAGTGAAACGACTAATAGC |
| PGM2 R  | CTGTCCCAAACCTCCATTCGGG  |
| HK1 F   | GCTCTCCGATGAAACTCTCATAG |
| HK1 R   | GGACCTTACGAATGTTGGCAA   |
| HK2 F   | GAGCCACCACTCACCCTACT    |
| HK2 R   | CCAGGCATTTCGGCAATGTG    |
| HK3 F   | GGACAGGAGCACCTCATTTC    |
| HK3 R   | CCTCCGAATGGCATCTCTCAG   |
| TPI1 F  | CTCATCGGCACTCTGAACG     |
| TPI1 R  | GCGAAGTCGATATAGGCAGTAGG |
| PCK2 F  | GCCATCATGCCGTAGCATC     |
| PCK2 R  | AGCCTCAGTTCCATCACAGAT   |
| ACSS2 F | AAAGGAGCAACTACCAACATCTG |
| ACSS2 R | GCTGAACTGACACACTTGGAC   |
| BPGM F  | TGCTTGGAATAAGGAGAACCGT  |
| BPGM R  | CCACAGTTCCGAGCTTCCTC    |
| ADH5 F  | ATGGCGAACGAGGTTATCAAG   |
| ADH5 R  | CATGTCCCAAGATCACTGGAAAA |
| LDHA F  | ATGGCAACTCTAAAGGATCAGC  |
| LDHA R  | CCAACCCCAACAACCTGTAATCT |

**Table S6.** List of 584 differentially expressed genes (DEGs) between F-CircAE2 and VECT group in NIH3T3 cells, in which 268 genes were upregulated.

**Table S7.** The top 11 enriched gene ontology terms from the Kyoto Encyclopedia of Genes and Genomes (KEGG) pathway analysis on up-regulated genes in F-CircAE2-NIH3T3 cells vs control.

**Table S8.** The table shows transcripts differentially expressed between shCirc2133 and control Kasumi-1 cells.

**Table S9.** The table shows transcripts differentially expressed between shCirc2231 and control Kasumi-1 cells.

**Table S10.** The pathways enriched following F-CircAEs knockdown in Kasumi-1 cells by Gene Set Enrichment Analysis (GSEA).

**Table S11.** The proteins binding with F-CircAE2.

**Table S12.** The top enriched KEGG pathways of F-CircAE2-associated proteins.
